# Supplementary material for: Ethics education in pediatrics: Implementation and evaluation of an interactive online course for medical students
Source: PubMed Central journal article supplement (PMC9733484; doi:10.3205/zma001576), 2022-11-15
Supplement: JME-39-55-s-002.pdf [file JME-39-55-s-002.pdf]

Attachment 2: Summary of the results of the Constructivist On-Line Learning Environment Survey (COLLES). For each scale the average scores on each associated item are presented as mean (blue line)  $\pm$  SD (vertical bars).

a

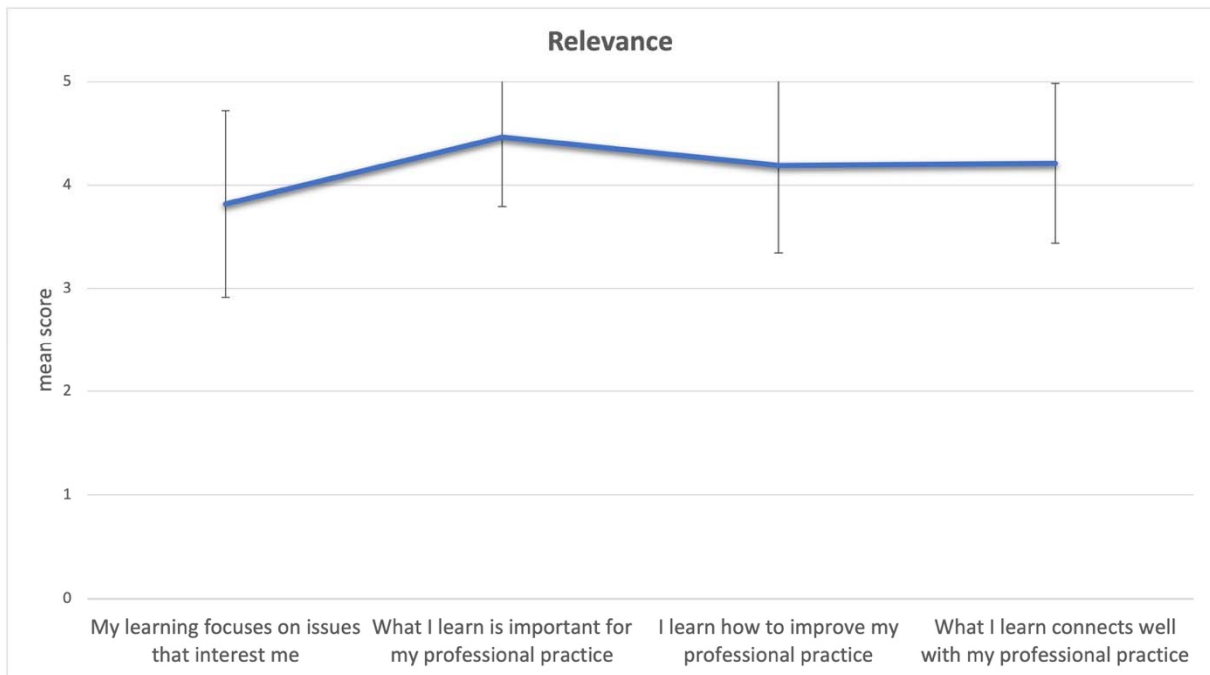

b

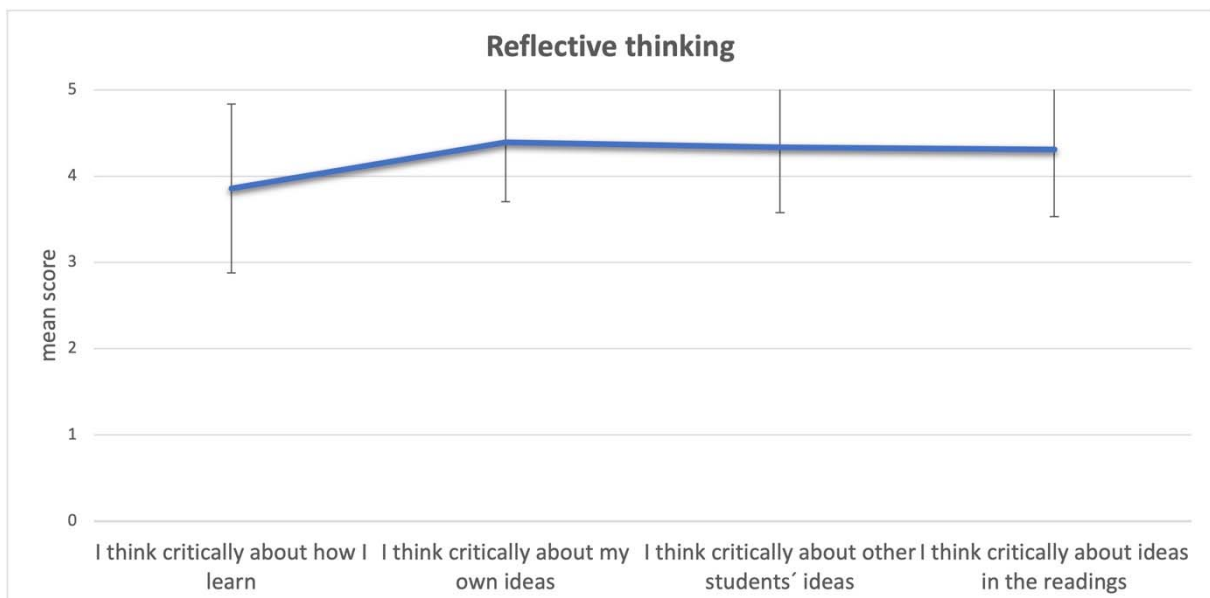

c

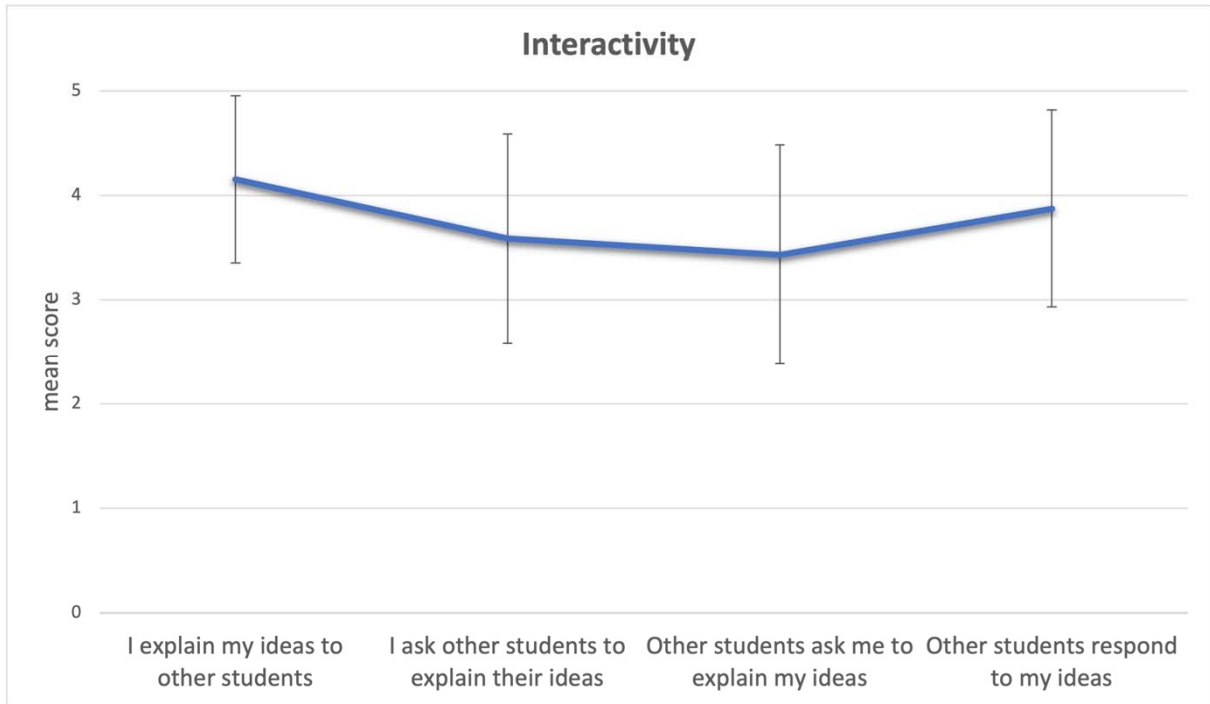

d

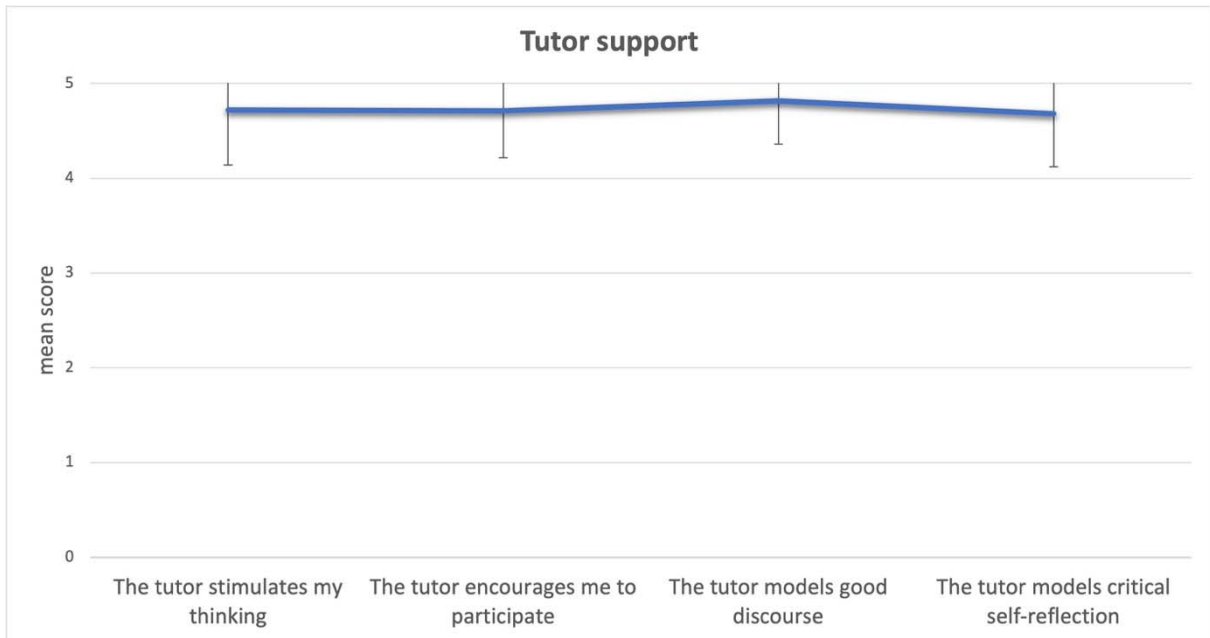

e

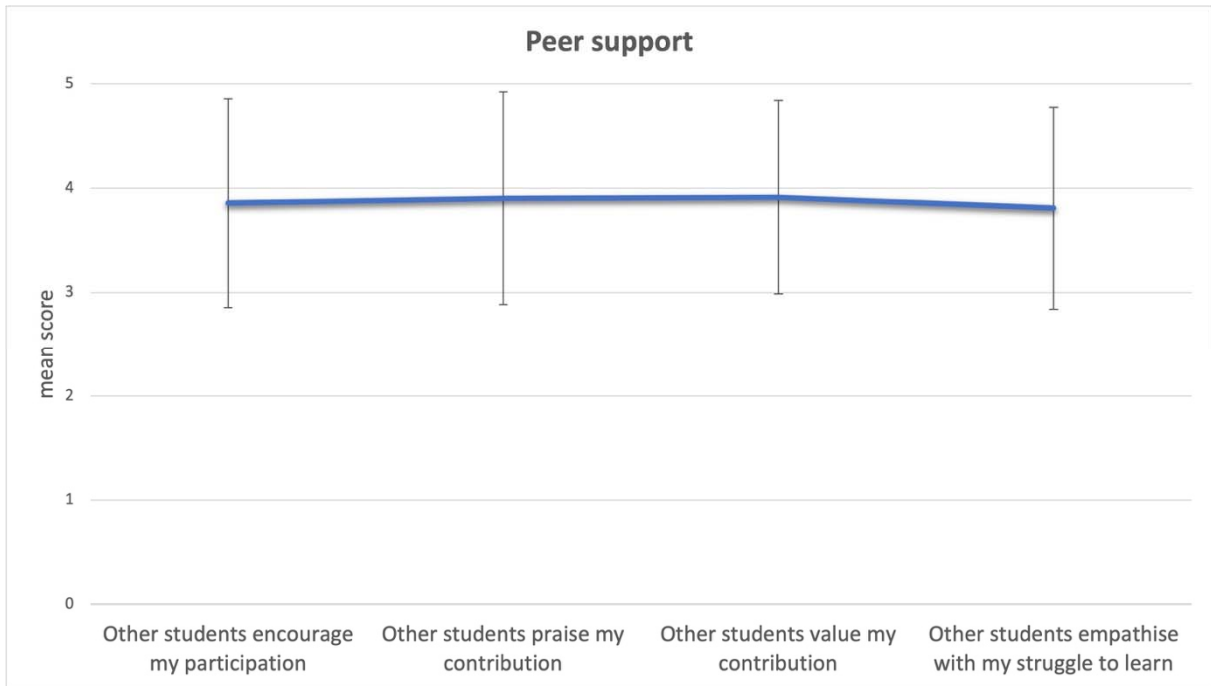

f

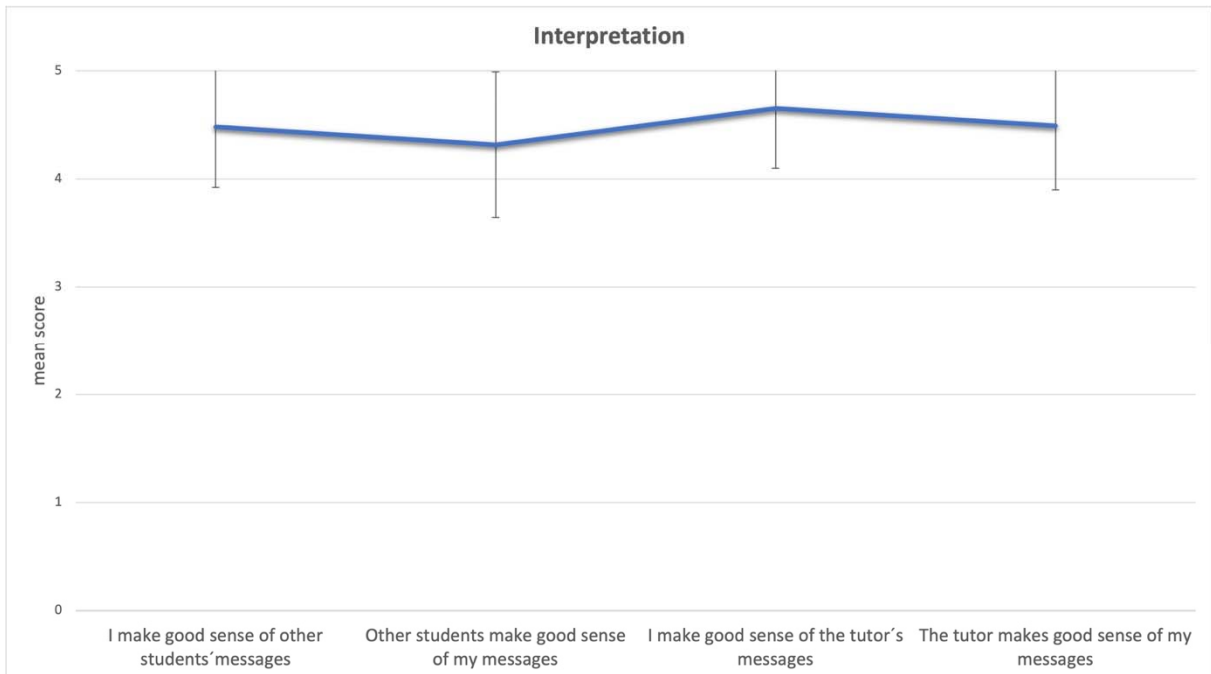

## Legend

Diagram 1 a-f summarizes the results of the students' (n=104) self-evaluation for the six domains (scales) of the Constructivist On-Line Learning Environment Survey (COLLES). For the assessment of each of the 24 items a fully verbalized 5-point Likert scale with the following scale points was used: 1 – “almost never”, 2 – “seldom”, 3 – “sometimes”, 4 – “often”, and 5 – “almost always”. The scores of each scale/domain are presented as mean  $\pm$  standard deviation (SD). The score range being 1-5, i.e., identical to the number of scale points.
